# Supplementary material for: Vascular targeting of anti-CD40 antibodies and IL-2 into autochthonous tumors enhances immunotherapy in mice
Source: JCI journal article supplement (doi:10.1172/jci33201), 2008-04-15

## Supplement

### Supplemental Figure 1

Splenic leukocytes after treatment with RGR-conjugated or unconjugated compounds. (A) Spleen cellularity (B) splenic CD8<sup>+</sup> T cells and (C) splenic CD11c<sup>+</sup> MHCclassII<sup>+</sup> dendritic cell counts were analyzed in control and treatment groups (n=3 per group). Mice were analyzed after 2 weeks of treatment (see Figure 2A). Controls are untreated 29-week-old RIP1-Tag5 mice and mice injected with rat IgG plus RGR peptide. Treatment with RGR-conjugated compounds results in significantly decreased splenic leukocytes as compared to unconjugated anti-CD40/IL-2. Error bars represent s.d.

### Supplemental Figure 2

Pancreas histology of long term survivors after triple treatment therapy. (A) Untreated 14 week-old RIP1-Tag5 mouse, anti-CD8<sup>+</sup> staining of an islet of Langerhans embedded in exocrine pancreatic tissue. (B) Anti-CD8<sup>+</sup> staining of an islet of similar size in long term survivors (45 weeks) following IL-2-RGR/anti-CD40-RGR/transfer treatment with enhanced infiltration. Note, tumors are not detectable after therapy. Dotted lines delineate islets of Langerhans, 20x objective, bar 50  $\mu$ m. (C) Representative staining for Tag in an untreated RIP1-Tag5 islet at 14 weeks of age. (D) "Patchy" Tag expression pattern after triple treatment in mice at the age of 45 weeks, 60x objective, bar 20  $\mu$ m. New tumors arise from these islets after a lengthy period without treatment (age >90 weeks) due to continuous Tag expression in some  $\beta$  cells.

# Supplemental Figure 1

Hamzah et al.

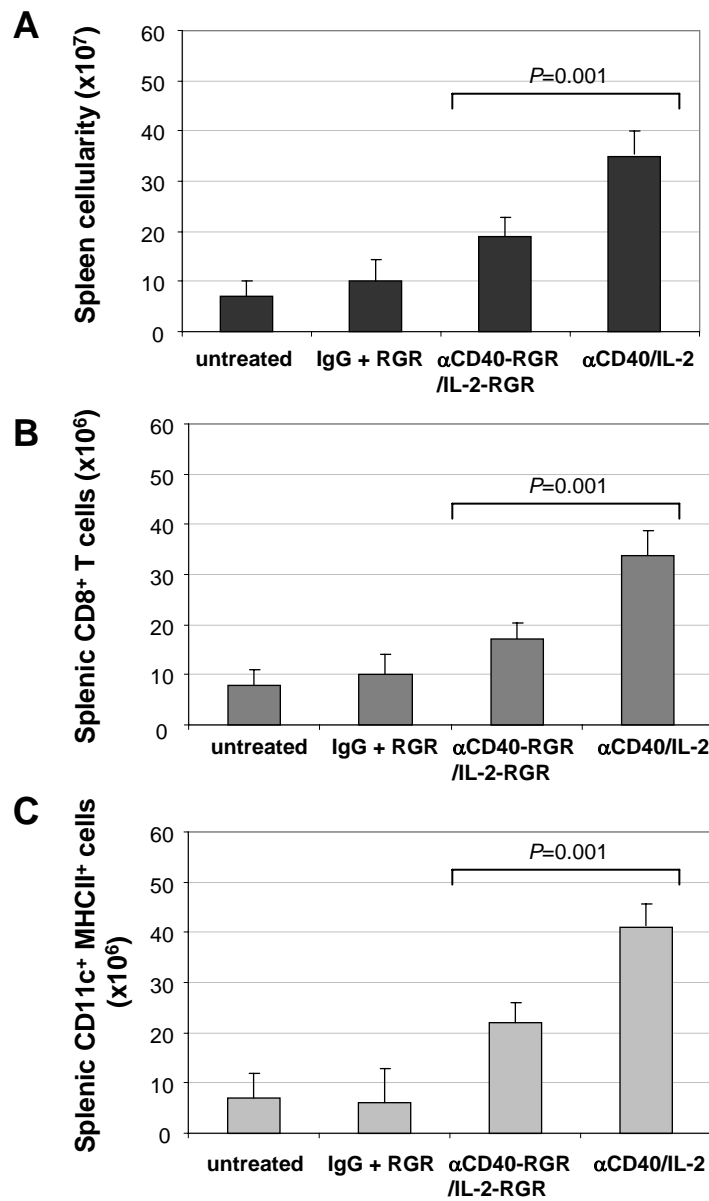

Supplemental Figure 2  
Hamzah et al.

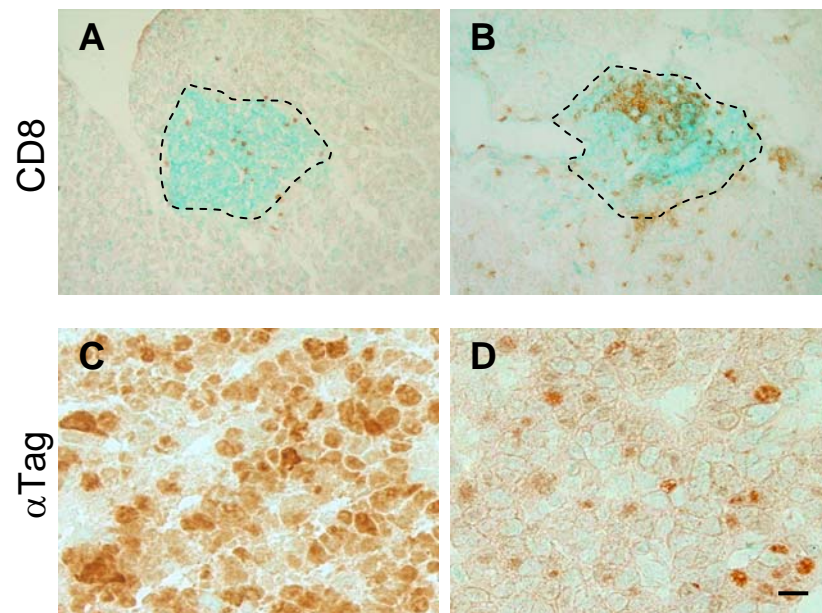

Supplement: sd1 [file 1]
